# Supplementary material
Source: PubMed Central journal article supplement (PMC7854520)
Supplement: NIHMS1654275-supplement-1.pdf [file NIHMS1654275-supplement-1.pdf]

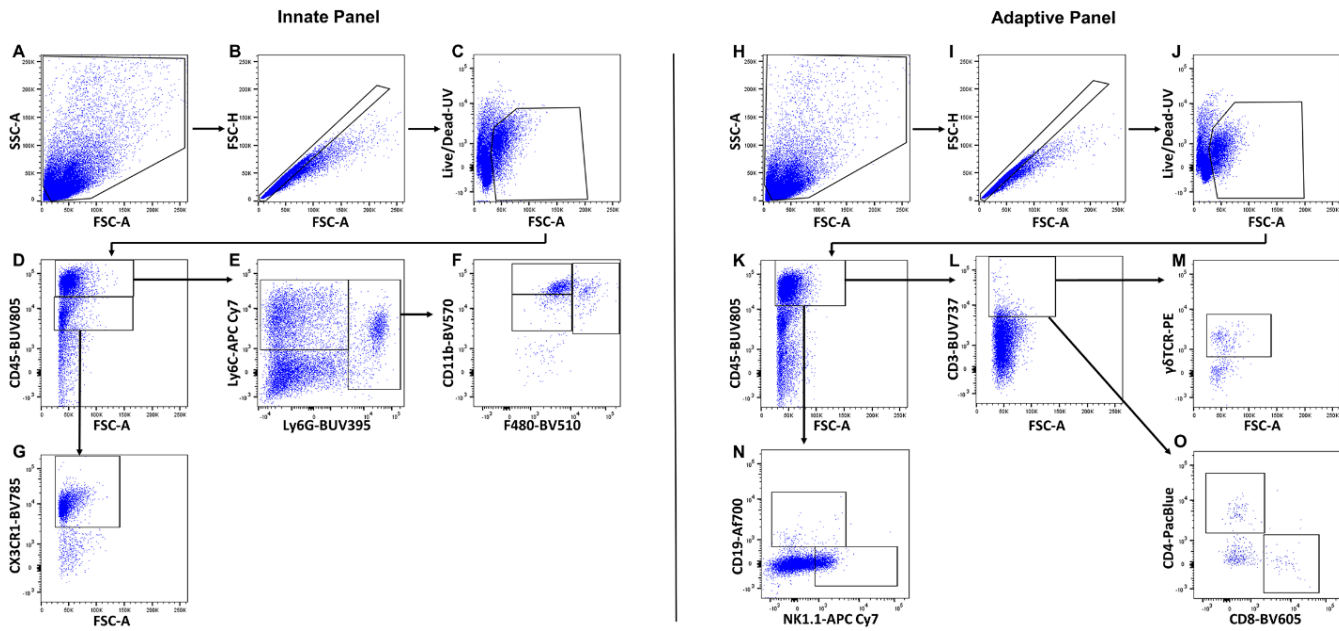

**Supplemental Figure 1. Gating strategy to quantify immune populations in the brain following *S. aureus* craniotomy infection.** From the (A, H) total events, (B, I) single cells were gated using FSC-A vs. FSC-H, followed by (C, J) exclusion of dead cells. For the innate immune panel, (D) Live, CD45<sup>high</sup> leukocytes were separated into (E) Ly6G<sup>-</sup>Ly6C<sup>+</sup> monocytes vs. Ly6G<sup>+</sup>Ly6C<sup>+</sup> cells, which were further identified as (F) MDSCs (CD11b<sup>high</sup>Ly6G<sup>+</sup>Ly6C<sup>+</sup>F4/80<sup>-</sup>) and neutrophils (CD11b<sup>low</sup>Ly6G<sup>+</sup>Ly6C<sup>+</sup>F4/80<sup>-</sup>) based on CD11b and F4/80 expression. Microglia were defined as (D) CD45<sup>low</sup> vs. FSC and (G) CX3CR1<sup>+</sup>. Adaptive immune cells were subjected to the same initial steps (H-J) as described for the innate immune panel, where (K) live, CD45<sup>high</sup> leukocytes were separated into (L) CD3<sup>+</sup> cells that were further divided into (M)  $\gamma\delta$  T cells ( $\gamma\delta$ TcR<sup>+</sup>) and (O) CD4<sup>+</sup> and CD8<sup>+</sup> T cells. (N) NK cells (NK1.1<sup>+</sup>) and B cells (CD19<sup>+</sup>) were identified from the CD45<sup>high</sup> population.

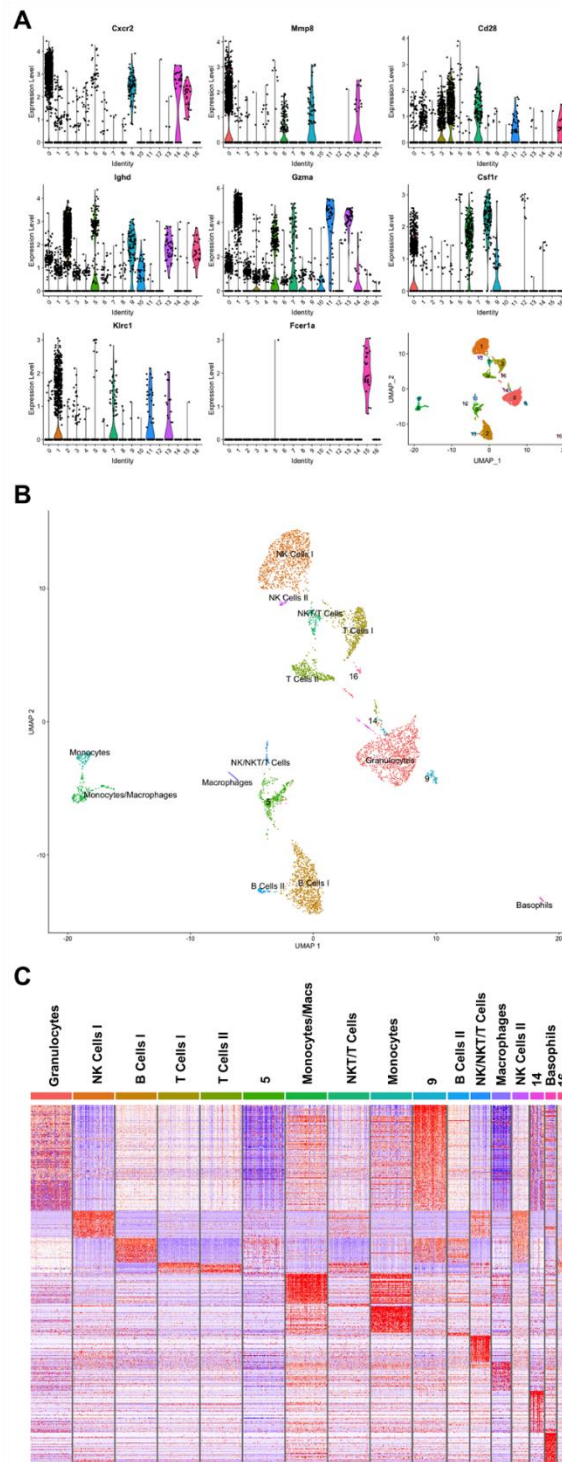

**Supplemental Fig. 2. Transcriptional profile of peripheral blood leukocytes during *S. aureus* craniotomy infection.** Viable CD45<sup>+</sup> cells were isolated from the blood (n= 4,914 cells) of mice (n=10) at day 7 following *S. aureus* craniotomy infection by FACS and processed for scRNA-seq. **(A)** Violin plots of select genes across the various clusters to facilitate cluster identification. **(B)** Transcriptional clusters were identified by SingleR and are presented as UMAP plots. **(C)** Heatmap of blood leukocyte clusters demonstrating the transcriptional heterogeneity across and within a given leukocyte type. Clusters that could not be accurately identified because they lacked a dominant transcriptional signature or included a mix of multiple leukocyte types were left as cluster numbers.

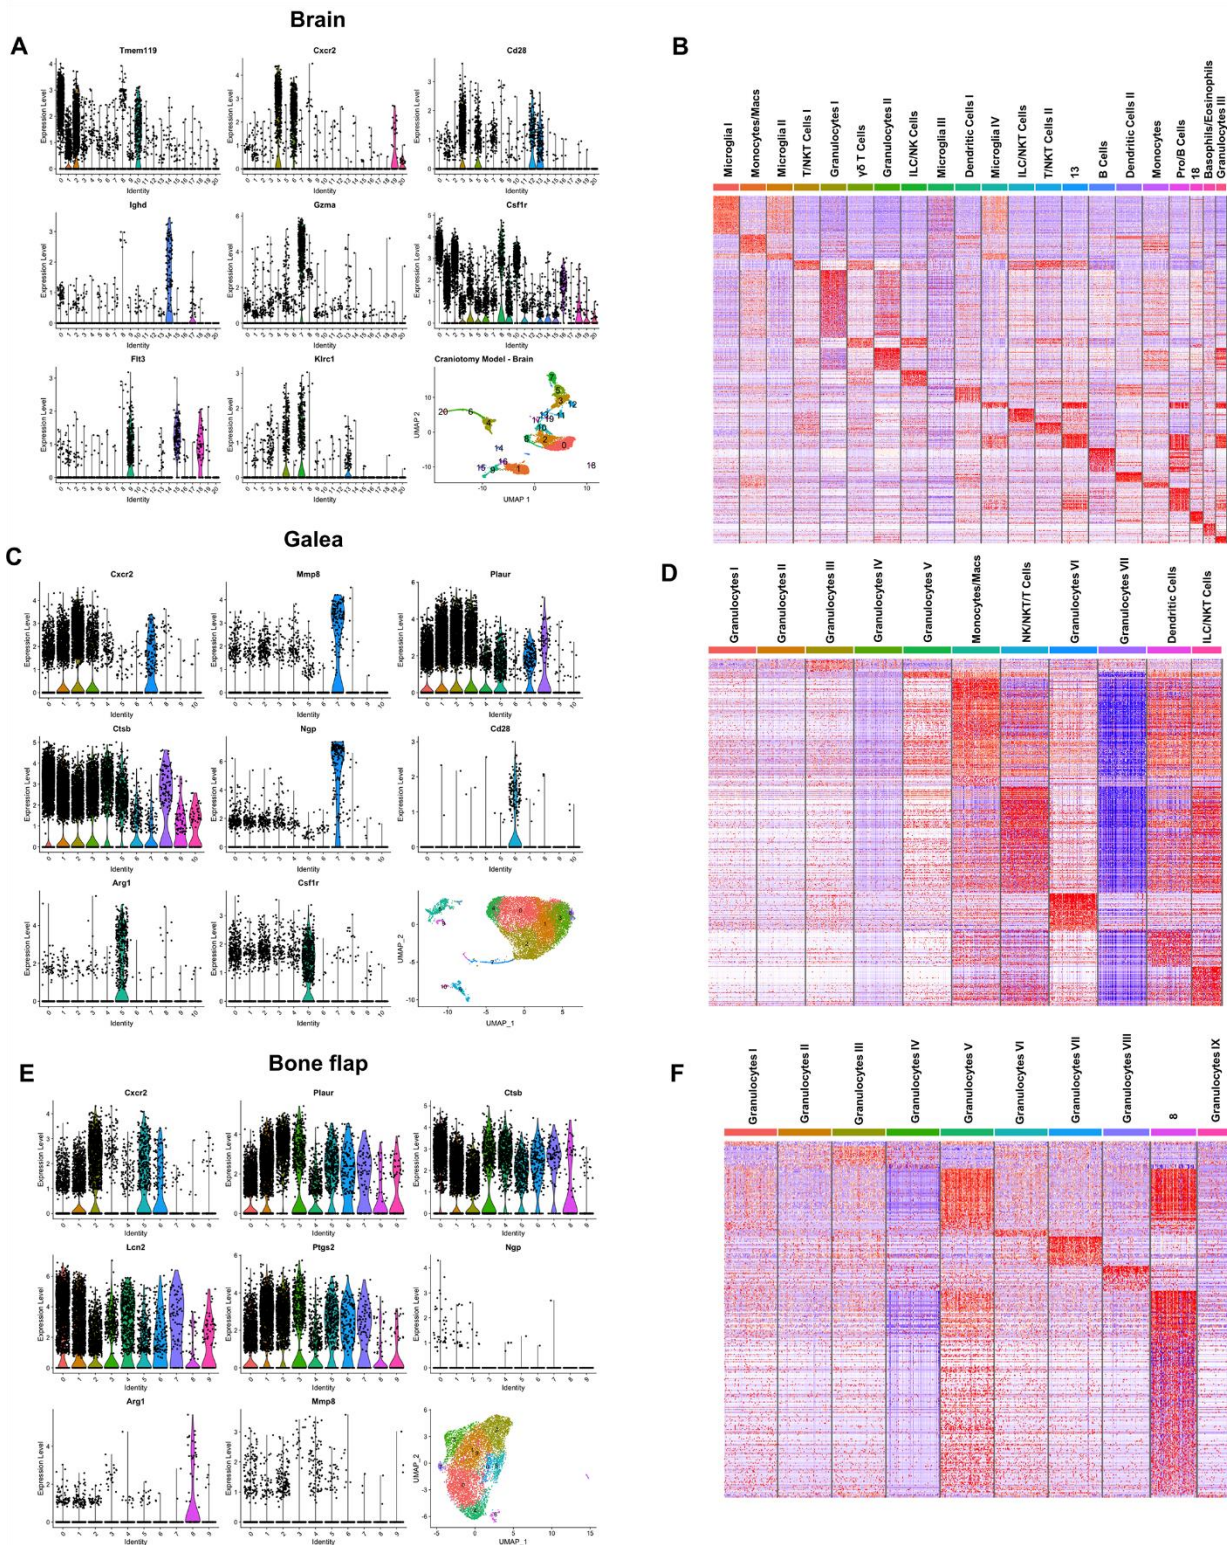

**Supplemental Fig. 3. scRNA-seq reveals predominant granulocyte infiltrates in the galea and bone flap following *S. aureus* craniotomy infection.** Viable CD45<sup>+</sup> cells were isolated from the (A and B) brain (n= 9,233 cells), (C and D) galea (n= 11,771 cells), and (E and F) bone flap (n= 6,672 cells) of mice (n=10) at day 7 following *S. aureus* craniotomy infection by FACS and processed for scRNA-seq. (A, C, and E) Violin plots of select genes across the various clusters, which were identified by SingleR and are presented as UMAP plots. (B, D, and F) Heatmaps of clusters demonstrating the transcriptional heterogeneity across and within a given cell type. Clusters that could not be accurately identified because they lacked a dominant transcriptional signature or included a mix of multiple leukocyte types were left as cluster numbers.
